# Supplementary material
Source: publisher site journal article supplement (https://www.dovepress.com/article/282689)
Supplement: Supplementary file 1 [file get_supplementary_file.php]

**Supporting Information**


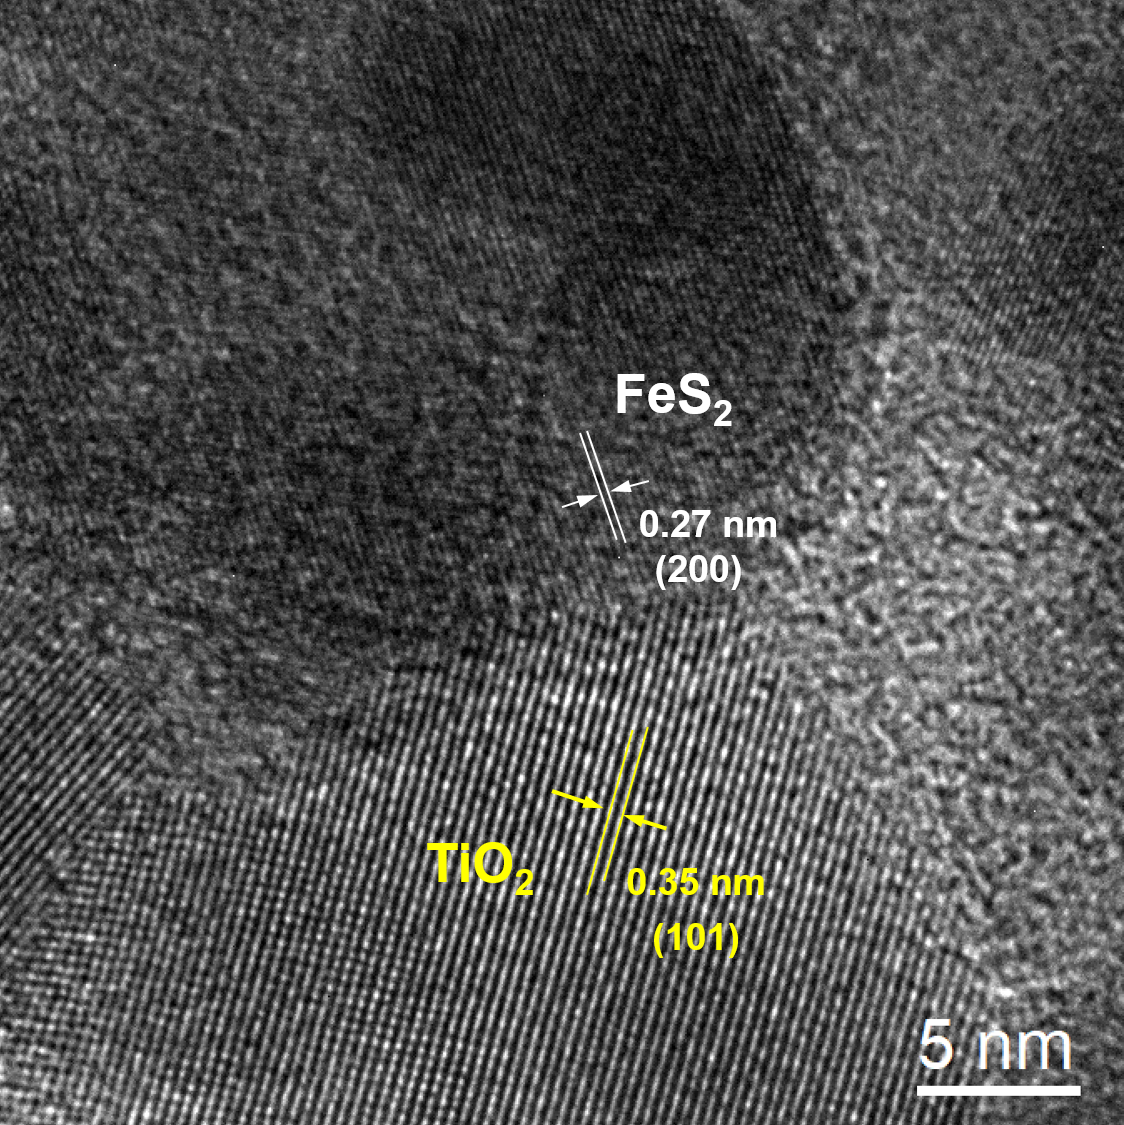


**Figure S1.** High-resolution transmission electron microscopy (HRTEM) image of heterostructured TiO2-FeS2 nanocomposites (NCs) consisted with TiO2 nanoparticles (NPs) and FeS2 NPs. In TiO2-FeS2 NCs, TiO2 NPs exhibited clearly lattice fringes with an interplanar distance of 0.35 nm corresponding to the (101) plane of the TiO2 anatase structure. FeS2 NPs revealed lattice fringes with 0.27 nm interplanar distance corresponding to the (200) plane of the FeS2 pyrite structure.


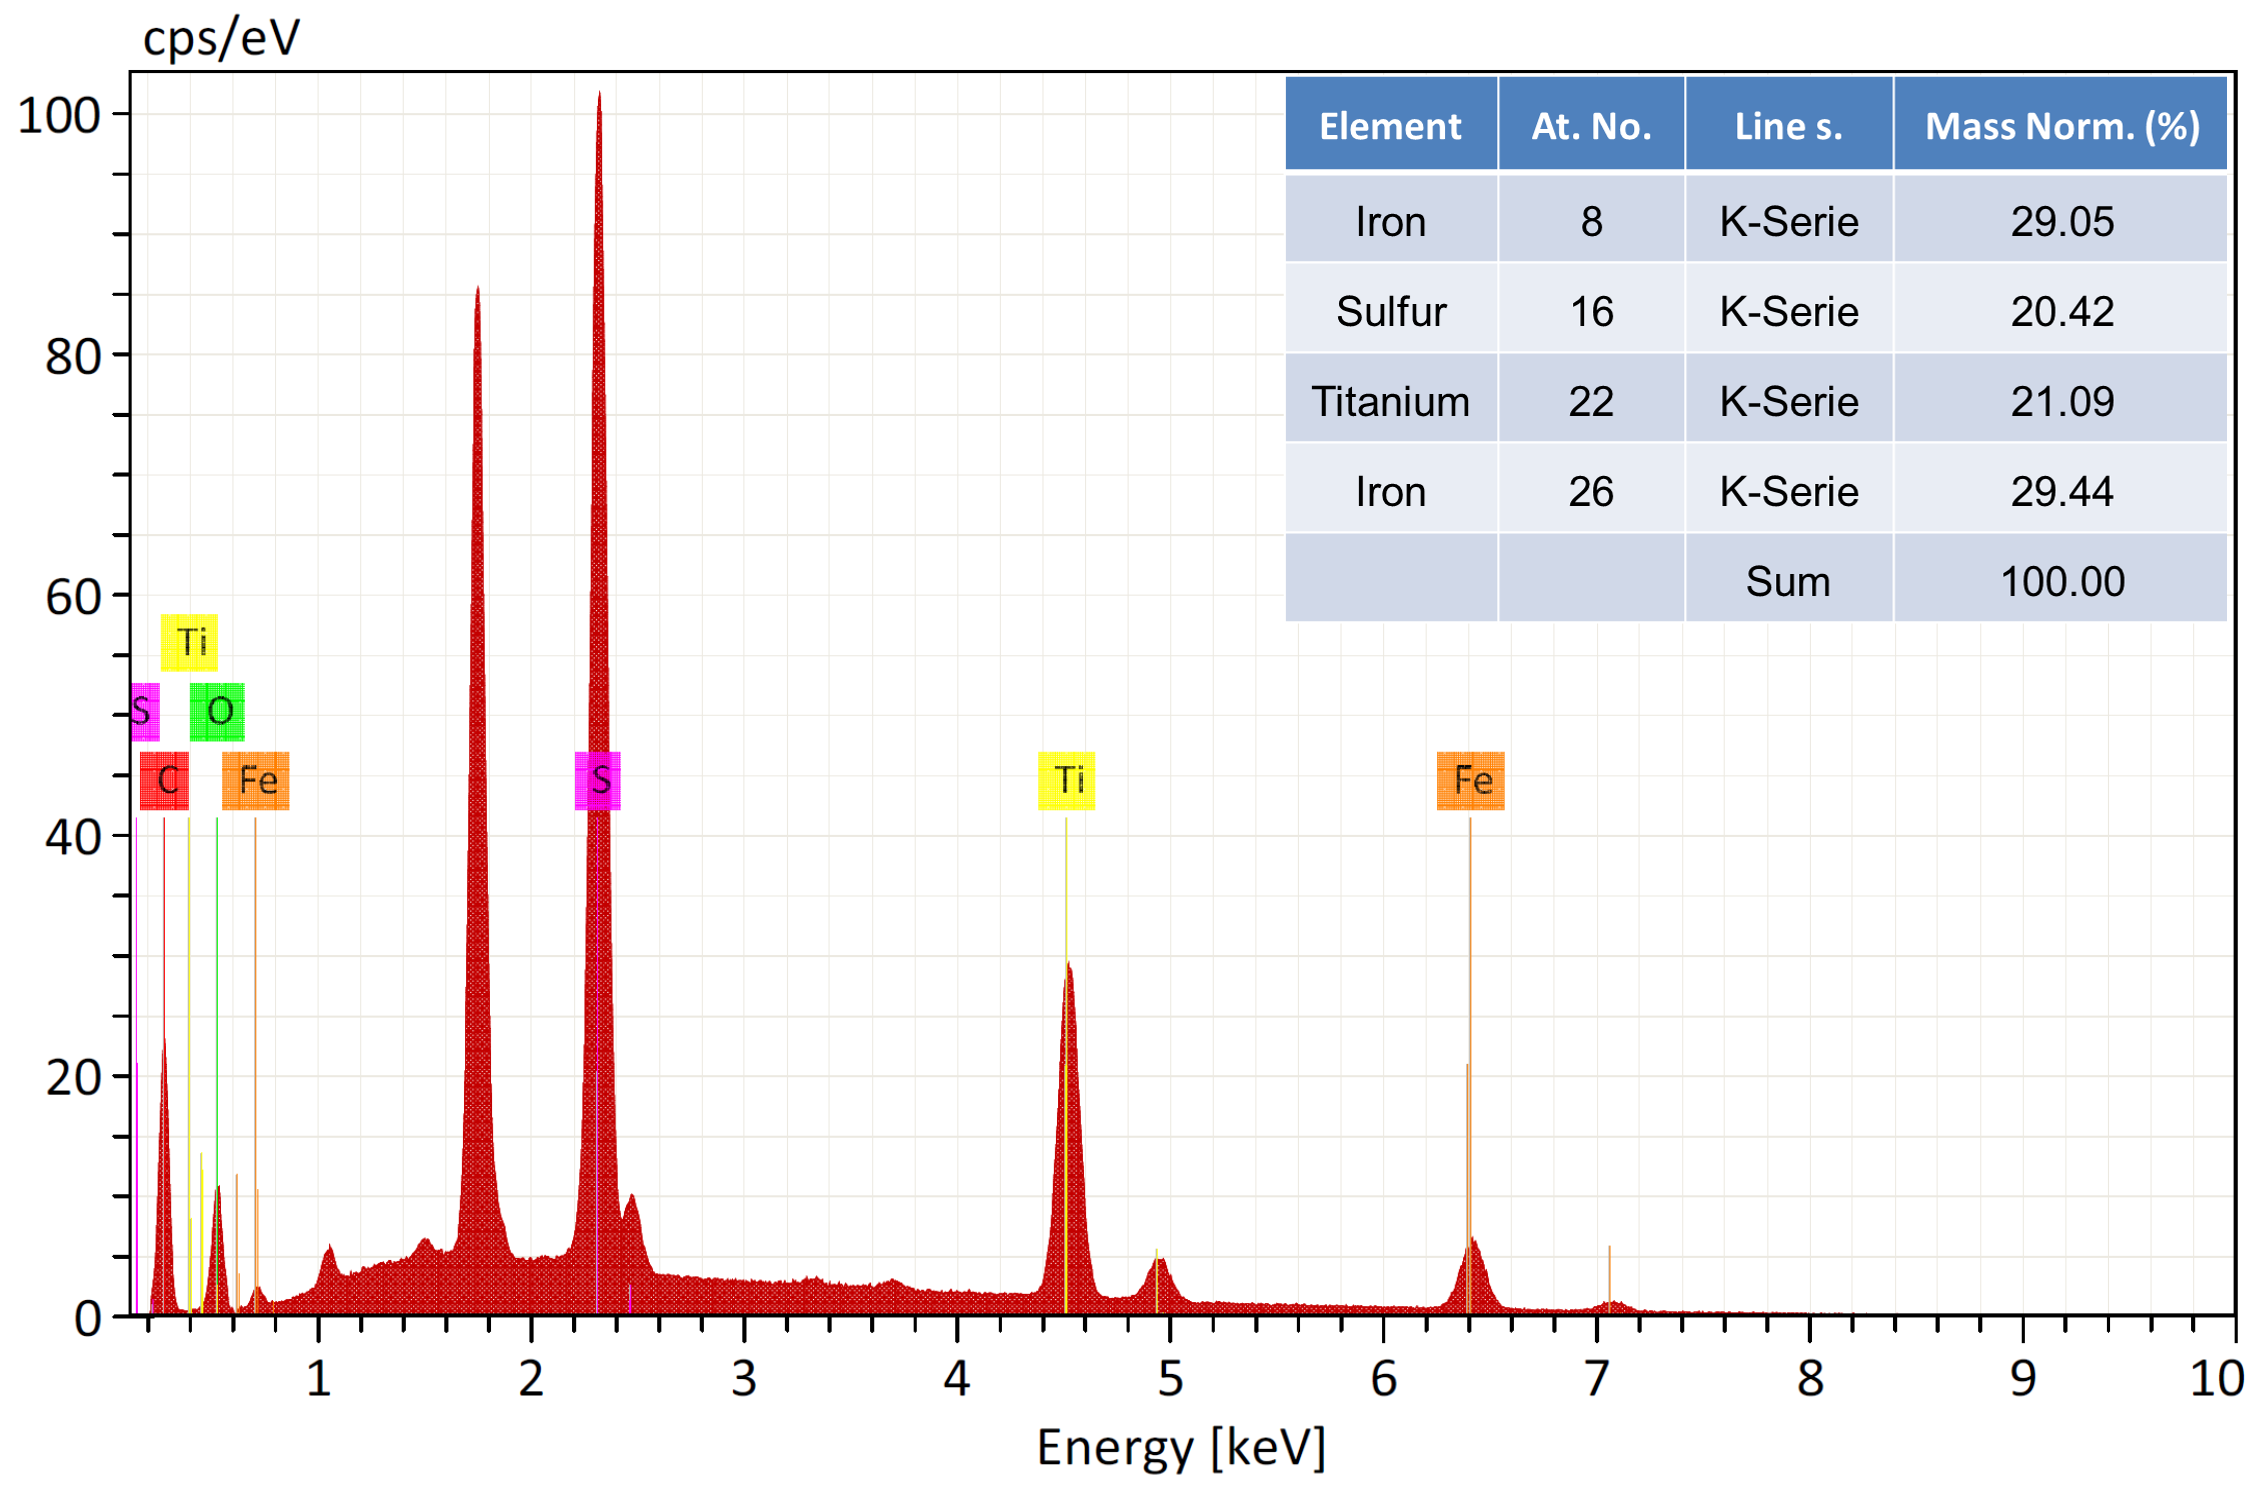


**Figure S2**. The energy-dispersive X-ray spectroscopy (EDS) spectra of TiO2-FeS2 nanocomposites (NCs). EDS spectra revealed the weight percent of FeS2 and TiO2 were respectively 49.47% and 50.53% in TiO2-FeS2 NCs.
